# Supplementary material for: Interplay of gut microbiota and host epithelial mitochondrial dysfunction is necessary for the development of spontaneous intestinal inflammation in mice
Source: PubMed Central journal article supplement (PMC10655390; doi:10.1186/s40168-023-01686-9), 2023-11-17
Supplement: 40168_2023_1686_MOESM1_ESM.pdf [file 40168_2023_1686_MOESM1_ESM.pdf]

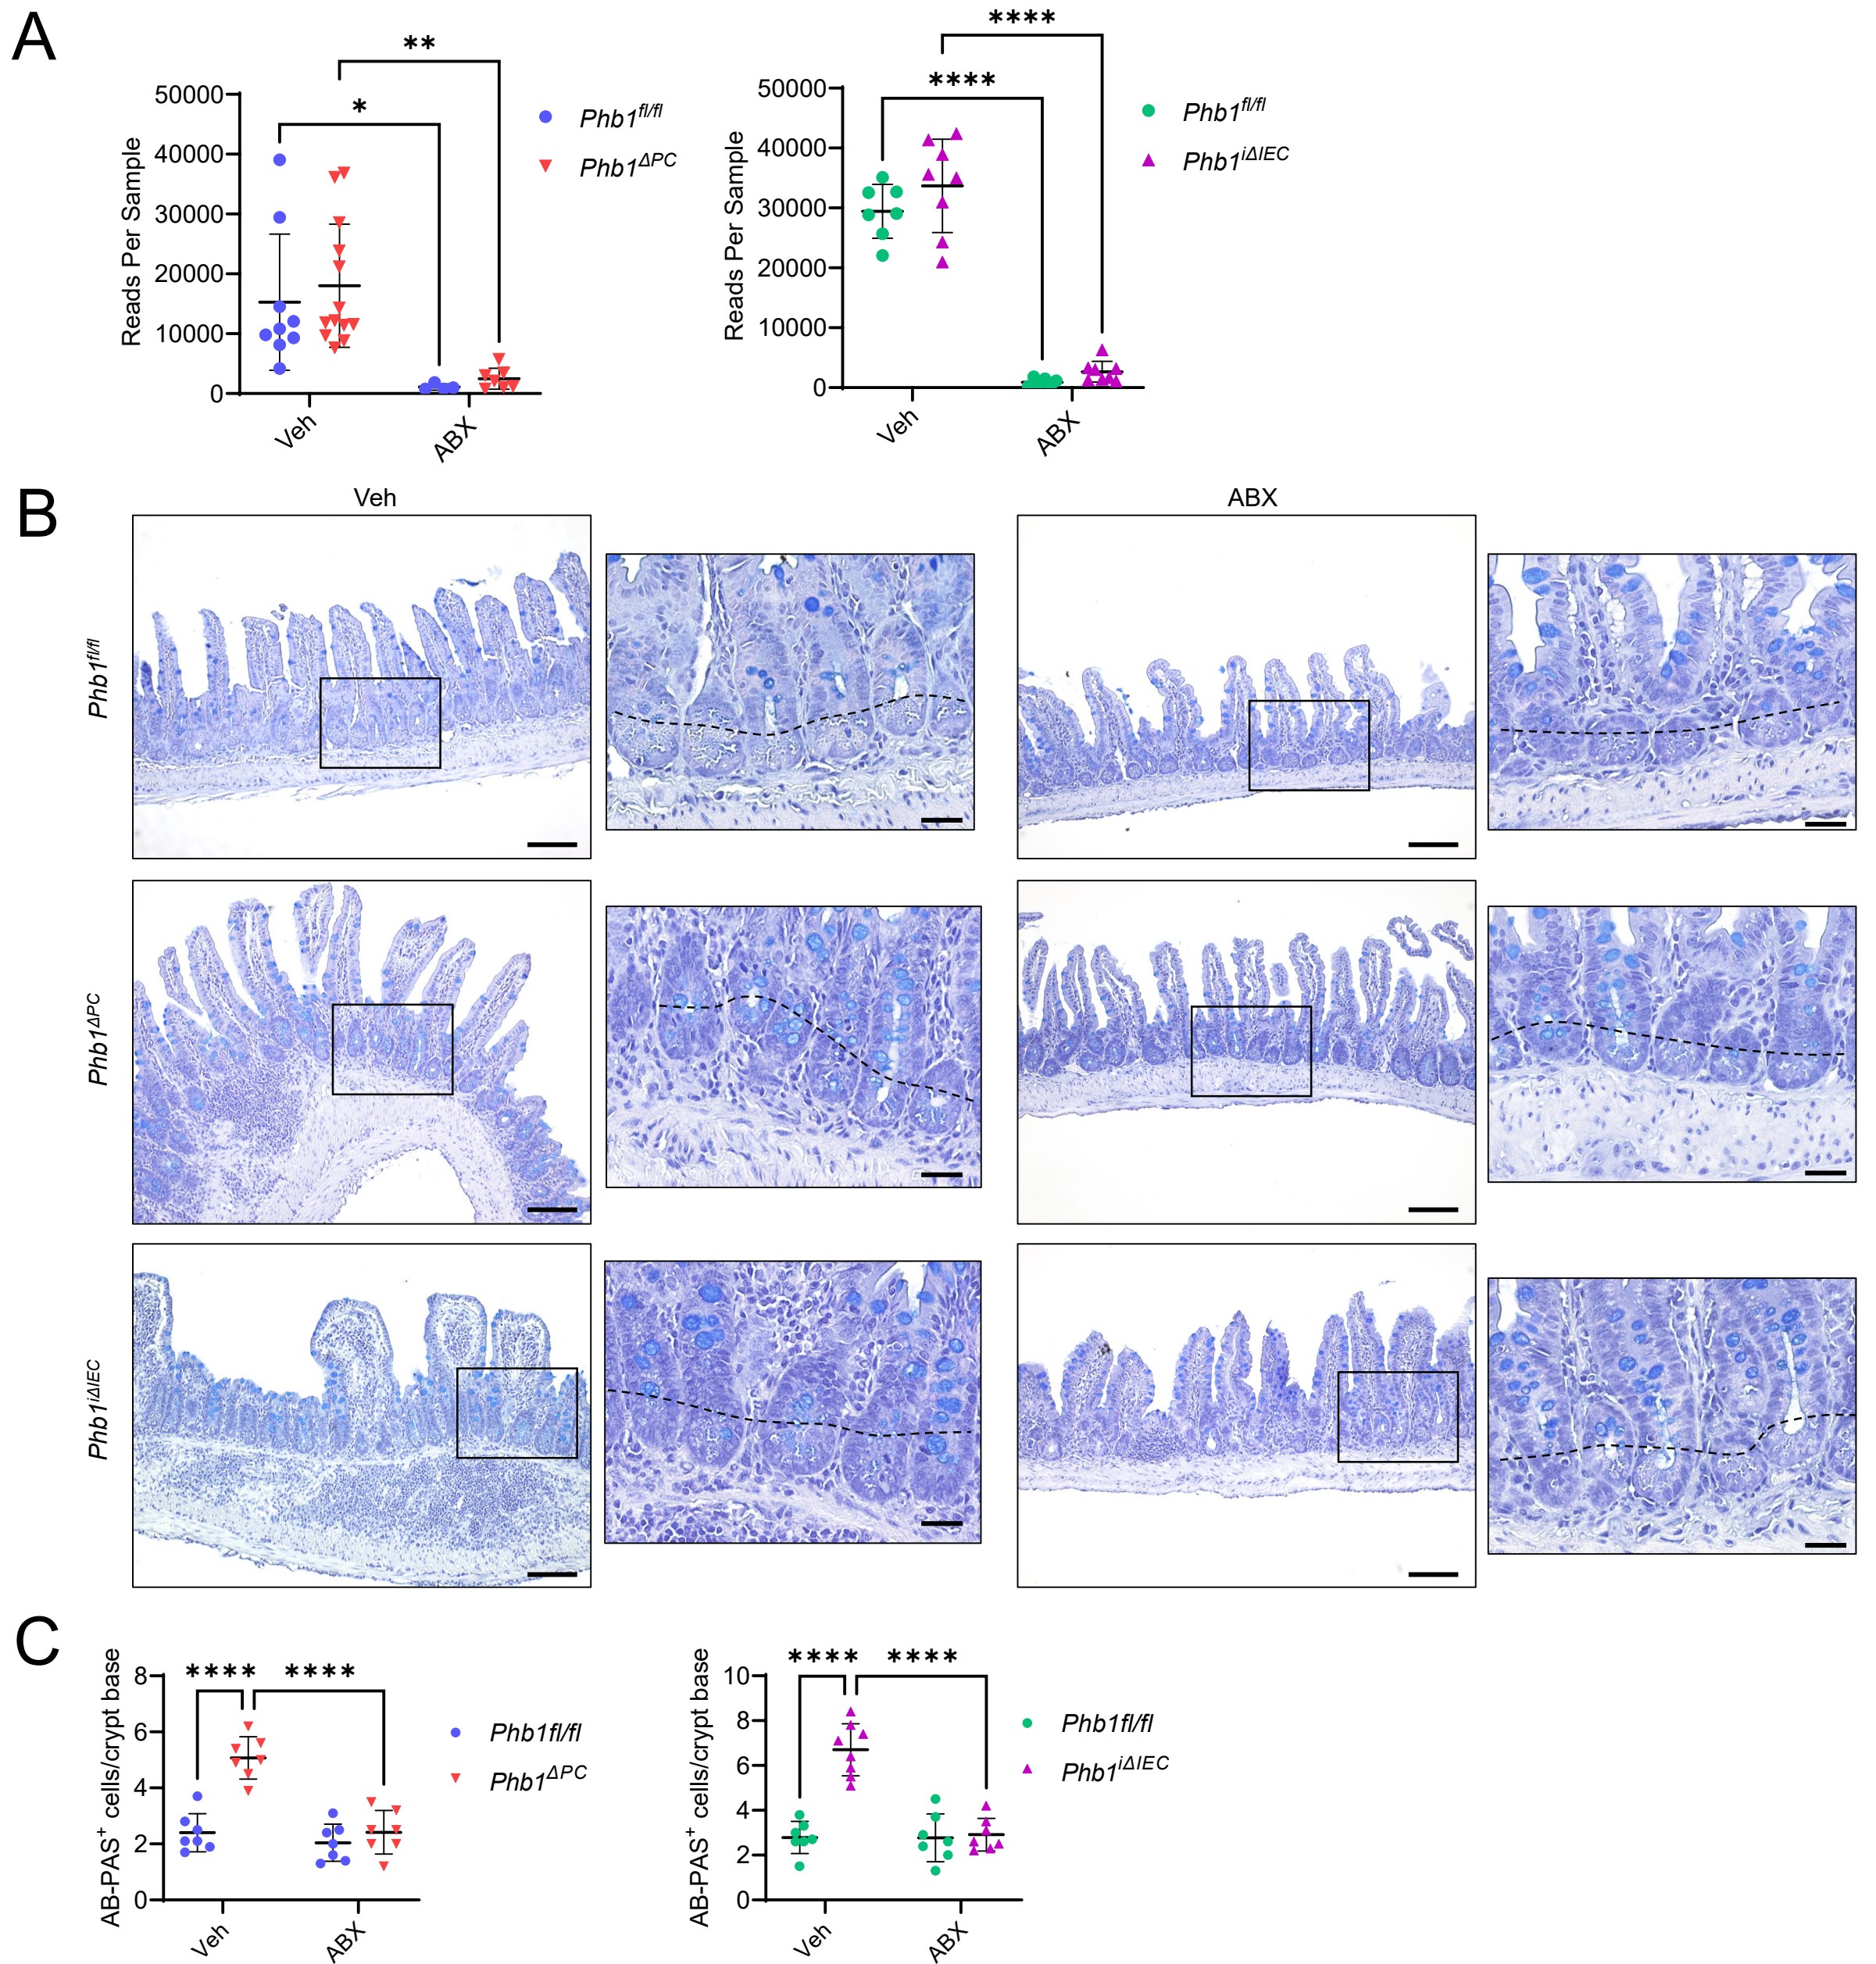

**Supplemental Figure S1. Elimination of gut microbiota by broad-spectrum antibiotics (ABX) prevents the manifestation of crypt base AB-PAS<sup>+</sup> cells in *Phb1* deficient mice.** (A) Bacterial elimination by ABX shown by reads per sample by 16S rRNA sequencing. (B) AB-PAS staining of ileum. Bar = 100  $\mu$ m. Dashed line denotes crypt base. (C) Number of AB-PAS<sup>+</sup> cells/crypt base across 50 crypts. AB-PAS, alcian blue-periodic acid Schiff.  $n = 7-13$  each group. \*\*\*\* $P < 0.0001$ .

## Co-housed across genotype

**A**

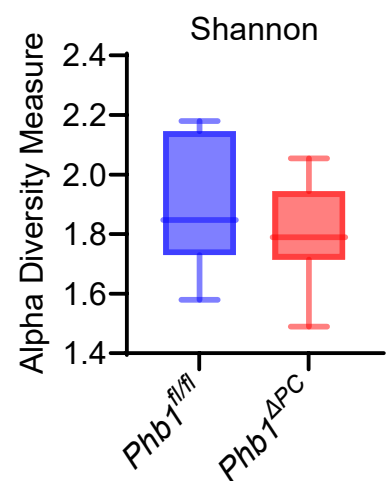

**B**

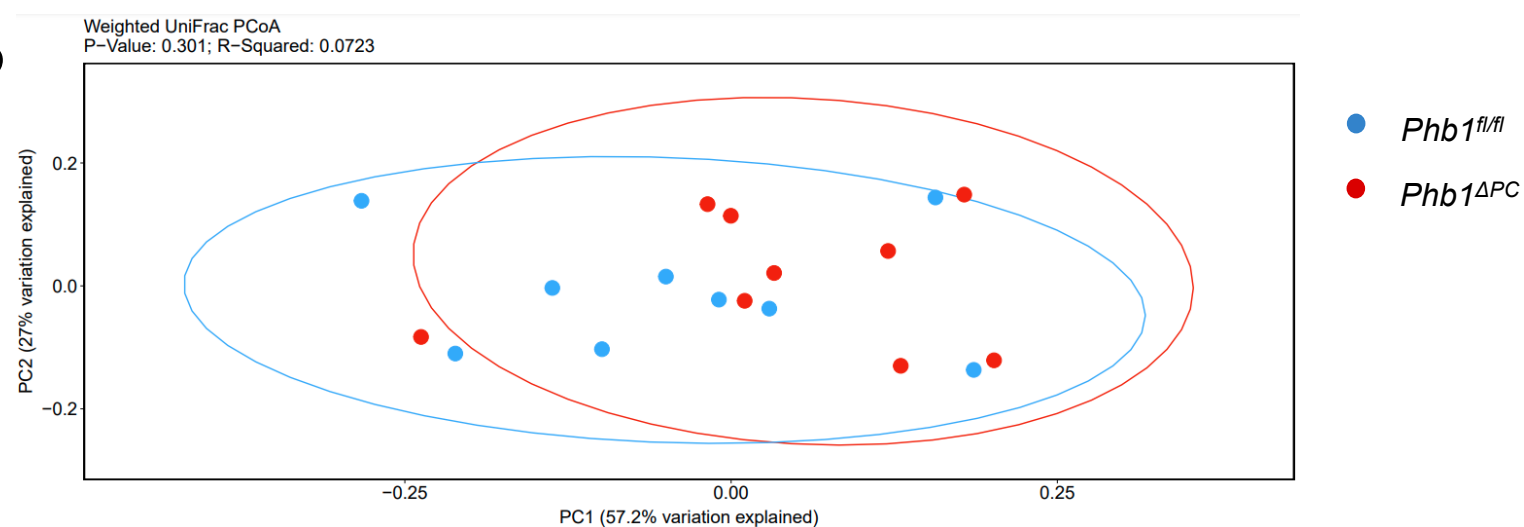

**C**

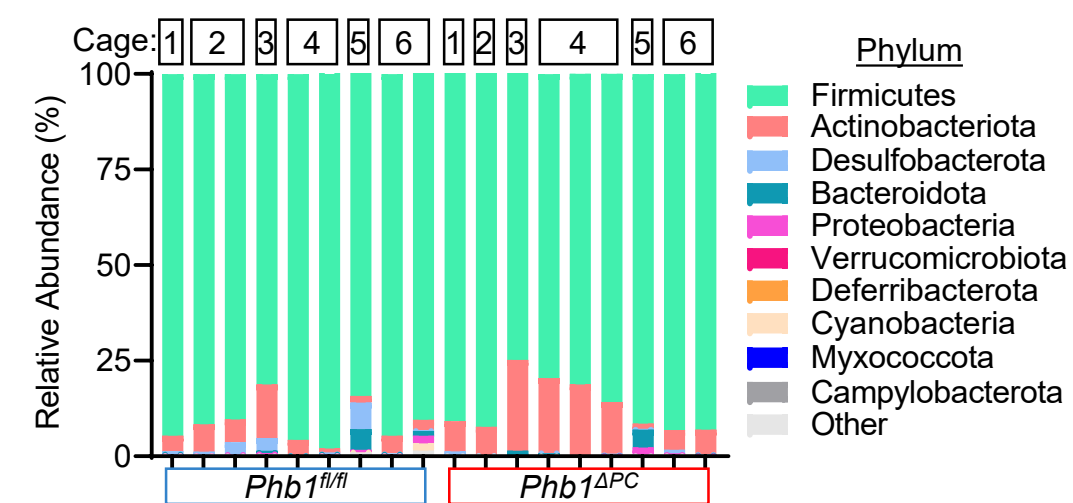

**D**

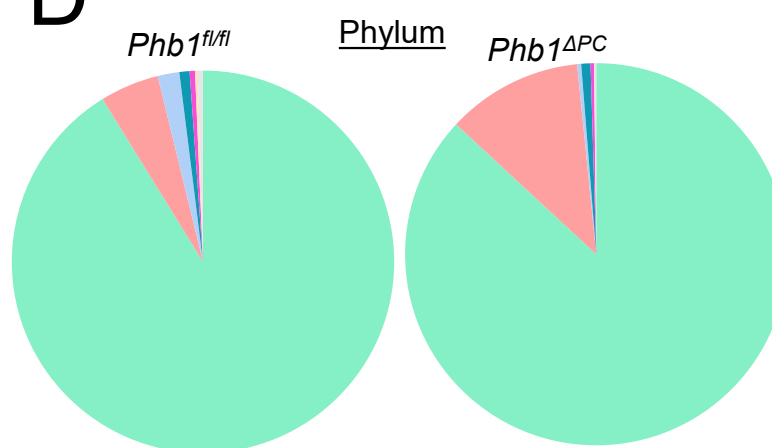

| Phylum (%)        | <i>Phb1<sup>fl/fl</sup></i> | <i>Phb1<sup>ΔPC</sup></i> |
|-------------------|-----------------------------|---------------------------|
| Firmicutes        | 91.2                        | 86.9                      |
| Actinobacteriota  | 5                           | 11.5                      |
| Desulfobacterota  | 1.8                         | 0.3                       |
| Bacteroidota      | 0.9                         | 0.8                       |
| Proteobacteria    | 0.5                         | 0.3                       |
| Verrucomicrobiota | 0                           | 0                         |
| Defferibacterota  | 0                           | 0                         |
| Cyanobacteria     | 0.2                         | 0                         |
| Myxococcota       | 0                           | 0                         |
| Campylobacterota  | 0                           | 0                         |
| Other             | 0.4                         | 0.2                       |

**E**

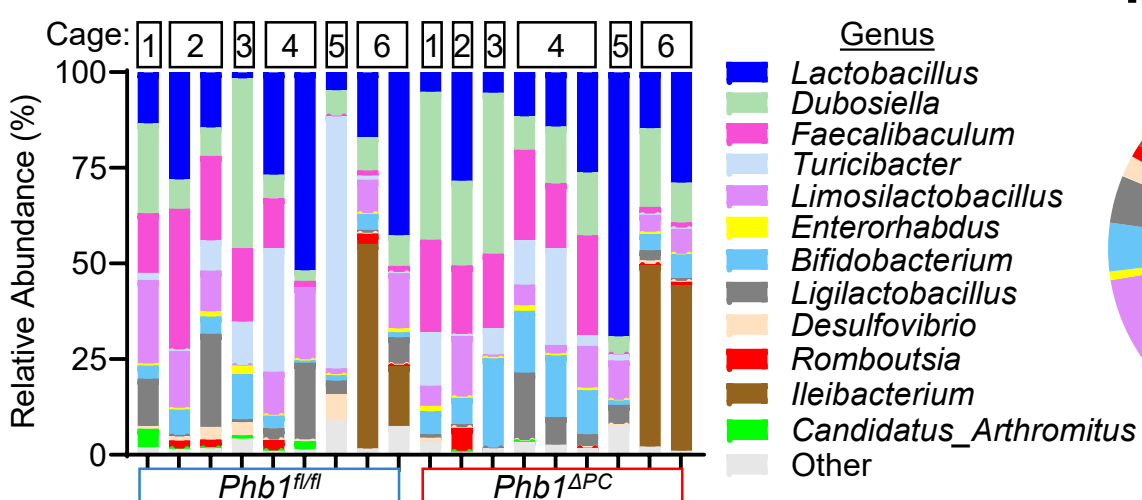

**F**

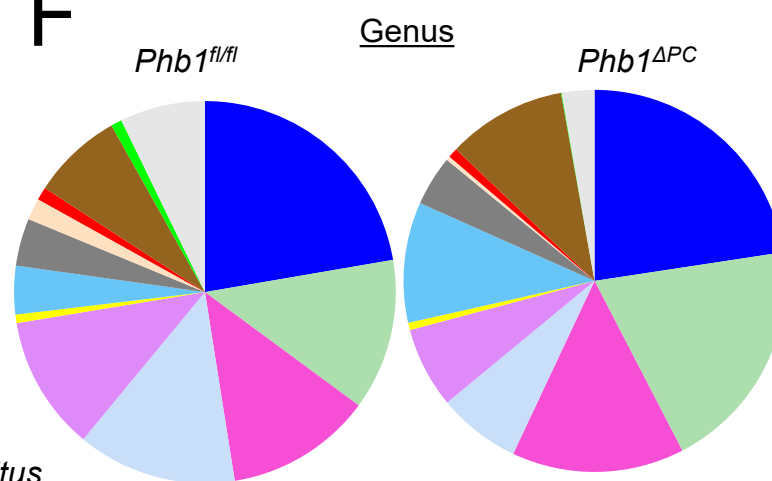

| Genus (%)                     | <i>Phb1<sup>fl/fl</sup></i> | <i>Phb1<sup>ΔPC</sup></i> |
|-------------------------------|-----------------------------|---------------------------|
| <i>Lactobacillus</i>          | 22.3                        | 22.6                      |
| <i>Dubosiella</i>             | 12.8                        | 19.8                      |
| <i>Faecalibaculum</i>         | 12.4                        | 14.6                      |
| <i>Turicibacter</i>           | 13.5                        | 7.0                       |
| <i>Limosilactobacillus</i>    | 11.4                        | 6.8                       |
| <i>Enterorhabdus</i>          | 0.7                         | 0.6                       |
| <i>Bifidobacterium</i>        | 4.1                         | 10.2                      |
| <i>Ligilactobacillus</i>      | 4.0                         | 4.3                       |
| <i>Desulfovibrio</i>          | 1.8                         | 0.3                       |
| <i>Romboutsia</i>             | 1.1                         | 0.8                       |
| <i>Ileibacterium</i>          | 7.7                         | 10.1                      |
| <i>Candidatus_Arthromitus</i> | 0.9                         | 0.06                      |
| Other                         | 7.2                         | 2.8                       |

**Supplemental Figure S2. Co-housed *Phb1<sup>ΔPC</sup>* mice exhibit similar ileal microbiota composition as *Phb1<sup>fl/fl</sup>* littermates.** 16S RNA sequencing of luminal ileal content of co-housed *Phb1<sup>fl/fl</sup>* and *Phb1<sup>ΔPC</sup>* mice. (A) Alpha diversity measure by Shannon index. (B) Weighted UniFrac PCoA plot of 16S rRNA gene sequences. (C-D) Relative abundance of bacteria at phylum level (C) in individual mice and (D) combined mice by genotype. (E-F) Relative abundance of bacteria at genus level (E) in individual mice and (F) combined mice by genotype. *n* = 9 each genotype.

Co-housed across genotype

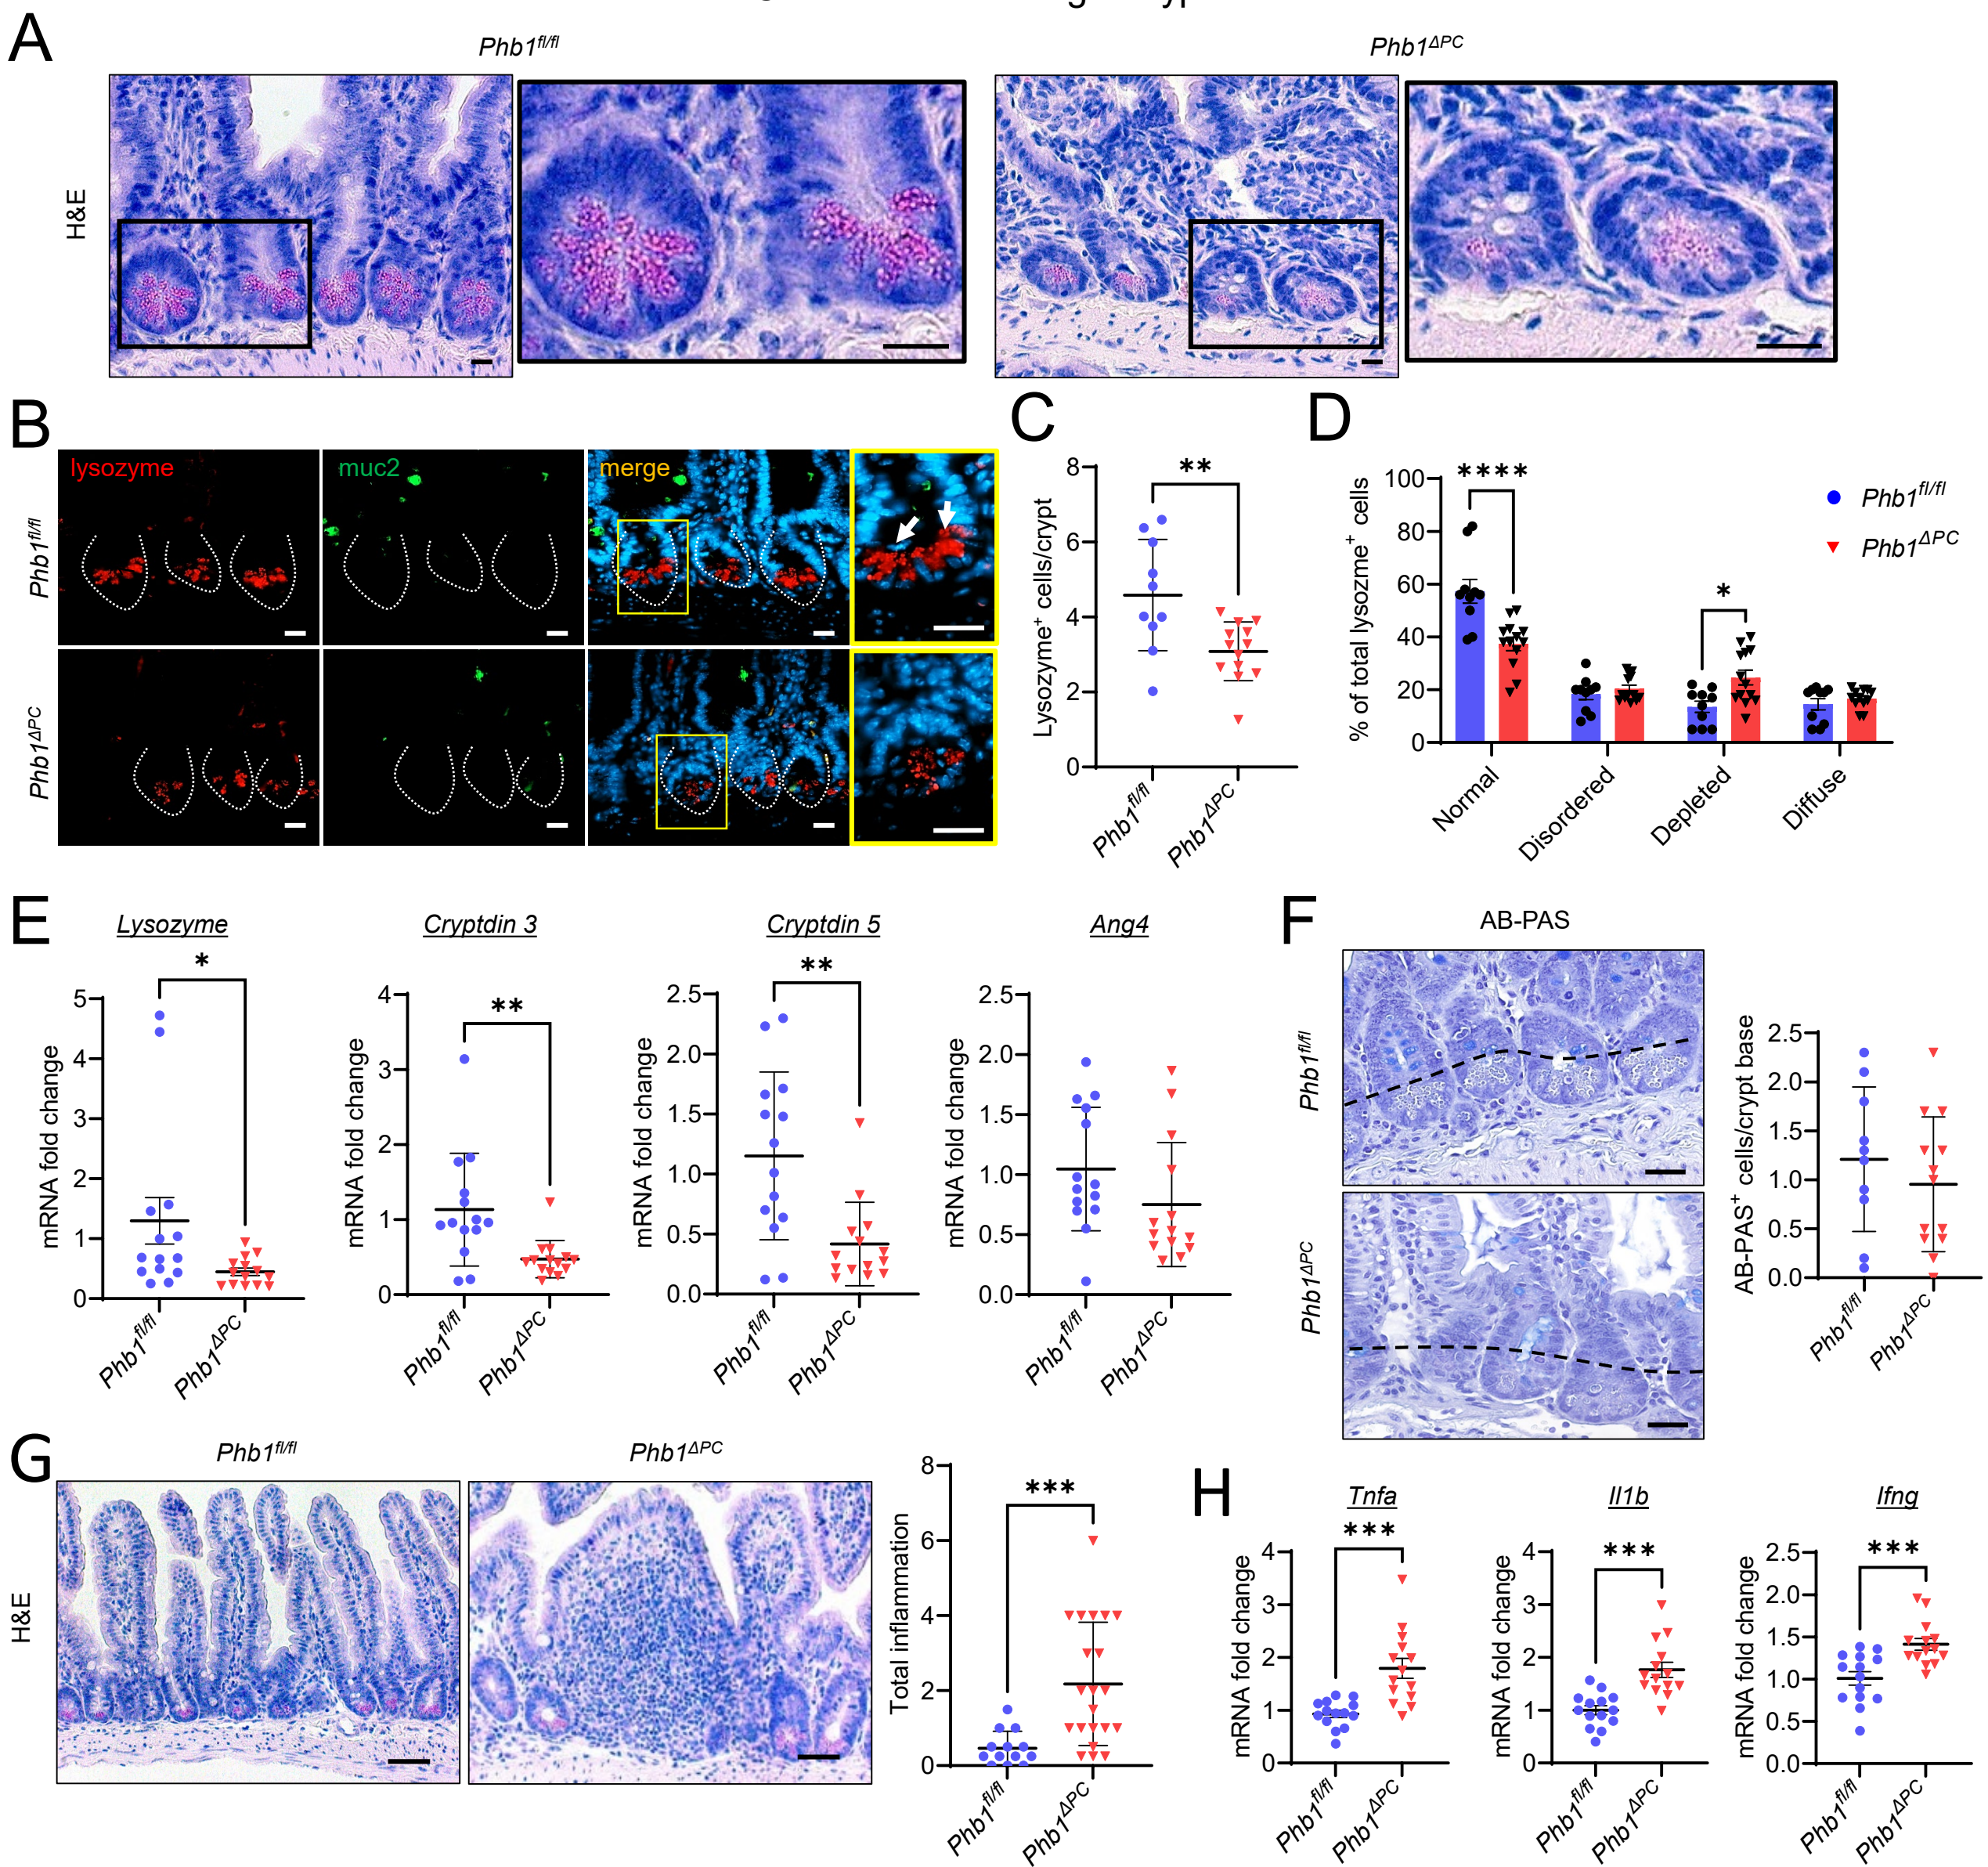

**Supplemental Figure S3. Co-housed *Phb1<sup>ΔPC</sup>* mice manifest PC abnormalities and ileitis.** (A) H&E staining showing Paneth cells (pink granules) in the ileal crypts. Bar = 50 μm; boxed pullout bar = 200 μm. (B) Immunofluorescent-staining for lysozyme (red), muc2 (green), and DAPI (nucleus, blue) in ileal crypts (dashed line). Arrows denote Paneth cells with normal lysozyme packaging into granules. Bar = 50 μm. (C) Average number of lysozyme<sup>+</sup> cells per crypt per mouse. A minimum of 50 crypts per mouse were quantitated. *n* = 13 *Phb1<sup>ΔPC</sup>* or 10 *Phb1<sup>fl/fl</sup>* littermates. (D) Paneth cell lysozyme allocation patterns. A minimum of 50 crypts per mouse were quantitated. *n* = 13 *Phb1<sup>ΔPC</sup>* or 10 *Phb1<sup>fl/fl</sup>* littermates. (E) mRNA quantification in ileum by qRT-PCR. *n* = 14 each genotype. (F) AB-PAS staining of ileum and number of AB-PAS<sup>+</sup> cells/crypt base. Bar = 100 μm. Dashed line denotes crypt base. *n* = 13 *Phb1<sup>ΔPC</sup>* or 10 *Phb1<sup>fl/fl</sup>* littermates. (G) Representative H&E-stained ileum and histological inflammation scoring of ileum. Bar = 100 μm. *n* = 21 *Phb1<sup>ΔPC</sup>* or 10 *Phb1<sup>fl/fl</sup>* littermates. (H) mRNA quantification in ileum by qRT-PCR. *n* = 14 each genotype. AB-PAS, alcian blue-periodic acid Schiff; Ang4, angiogenin 4; H&E, hematoxylin & eosin; Ifng, interferon gamma; Il1b, interleukin 1 beta; muc2, mucin2; Tnfa, tumor necrosis factor alpha. Results are presented as individual mice ± SD. \**P* < 0.05, \*\**P* < 0.01, \*\*\**P* < 0.001, \*\*\*\**P* < 0.0001.. \*\*\*\**P* < 0.0001.

Co-housed across genotype

A

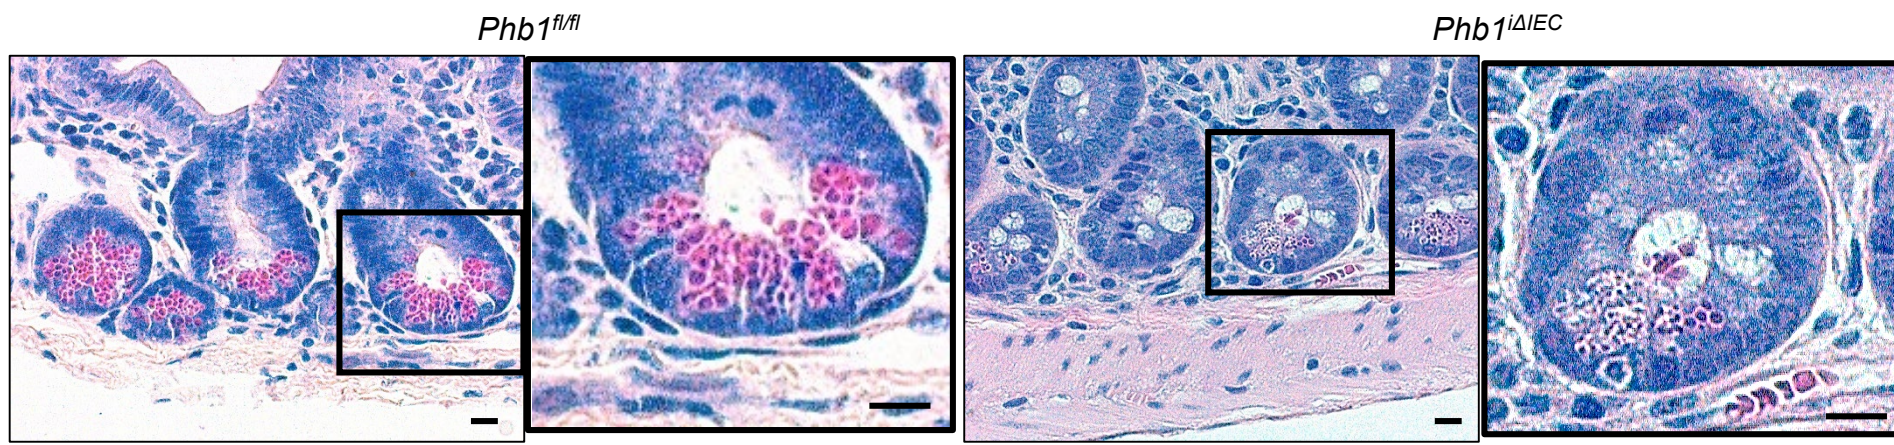

B

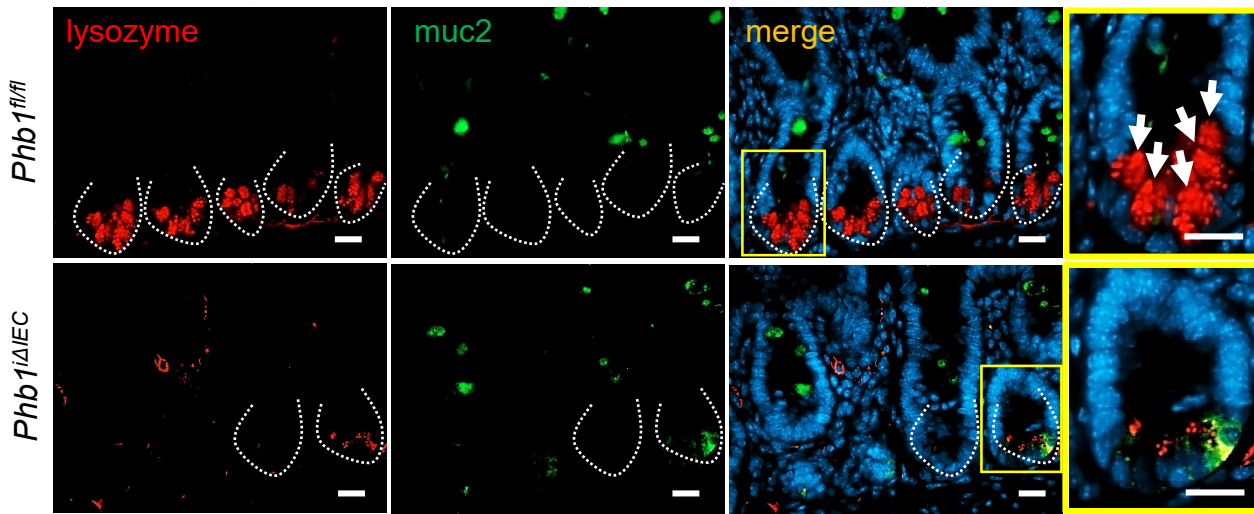

C

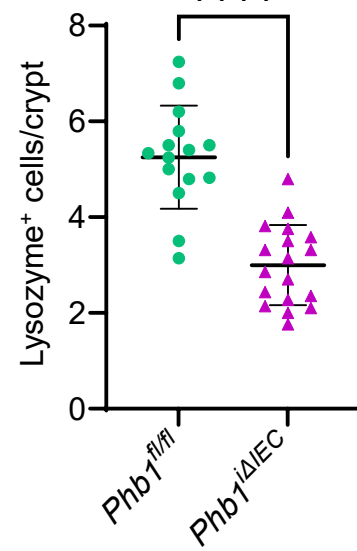

D

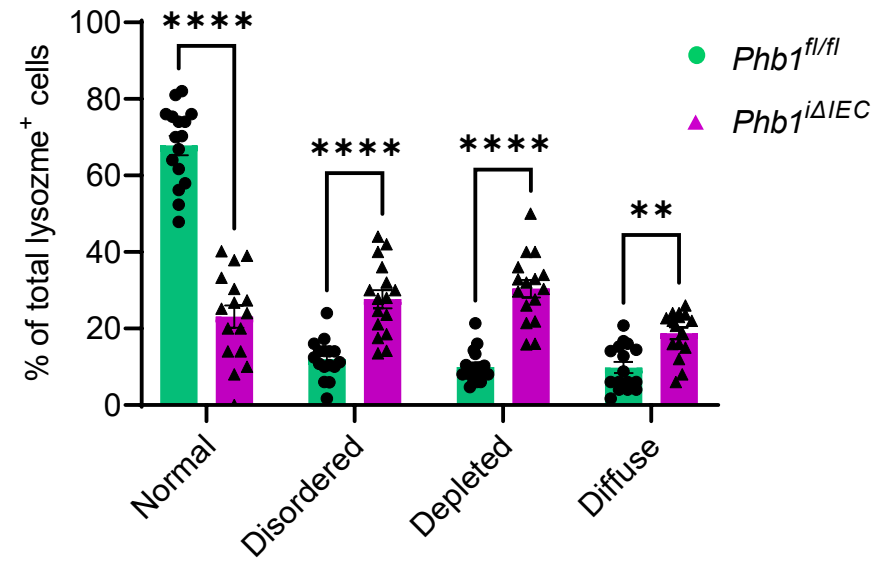

E

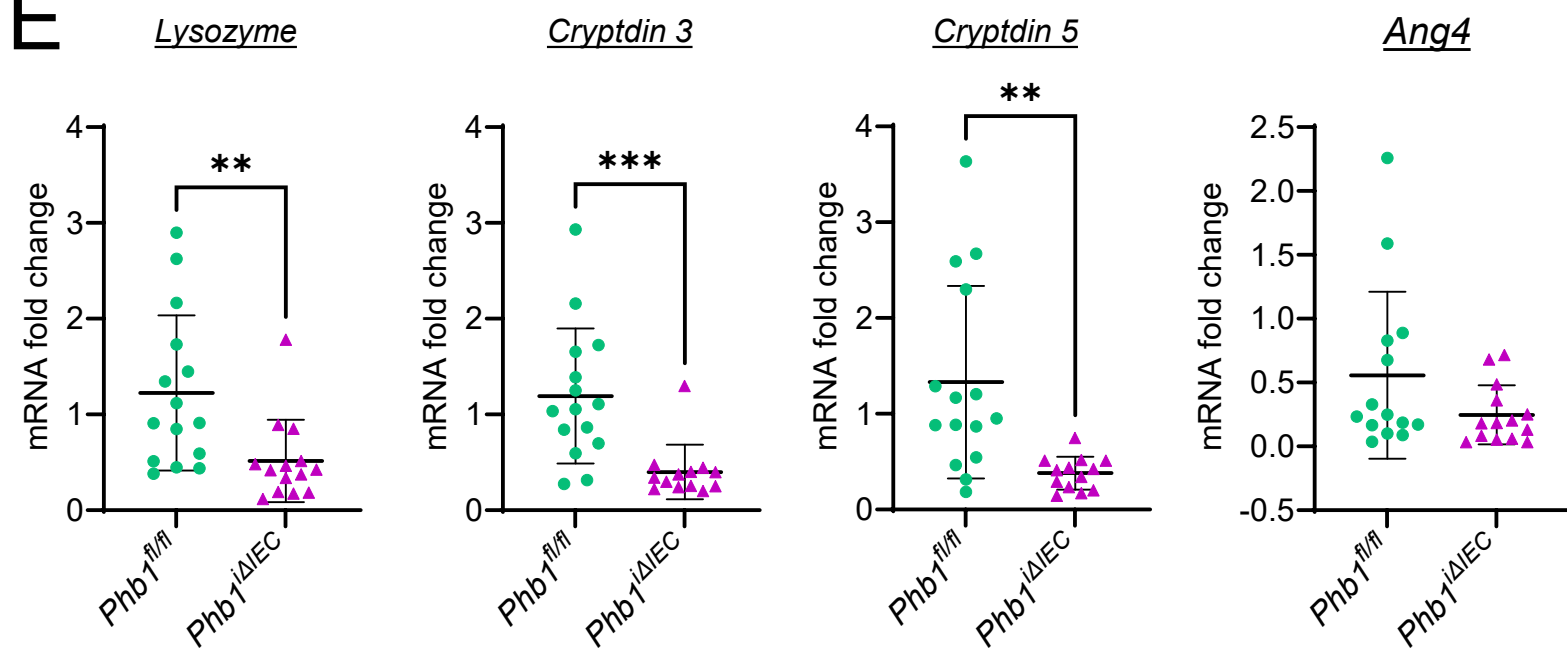

F

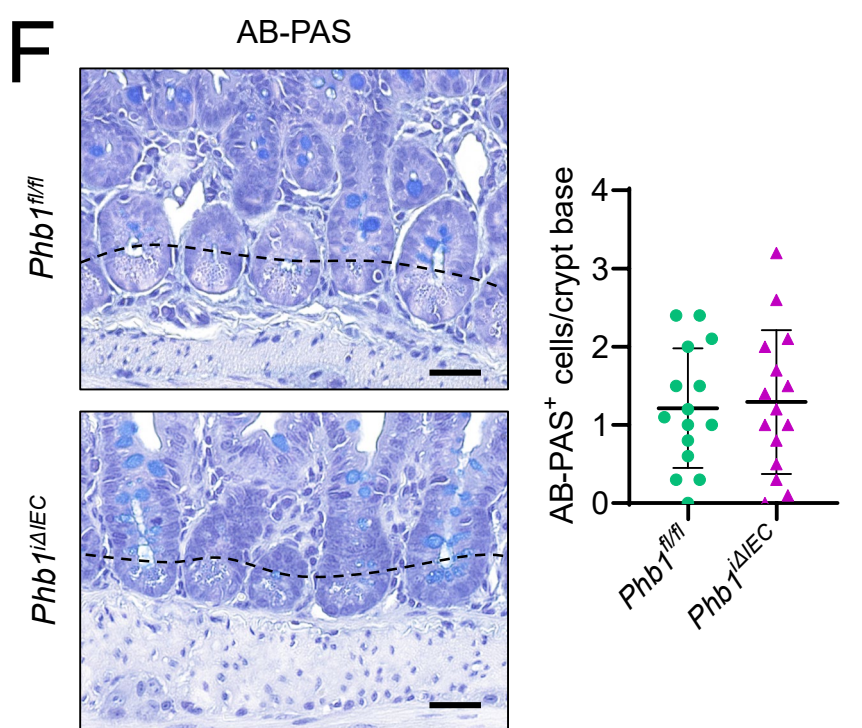

G

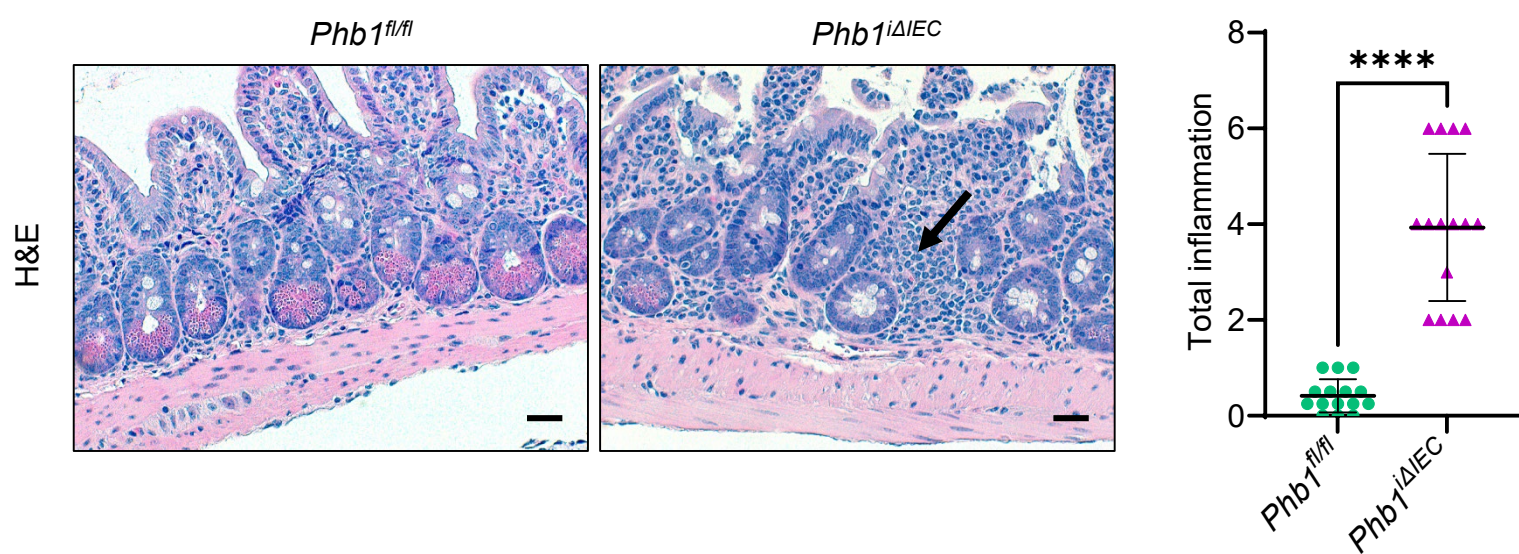

**Supplemental Figure S4. *Phb1<sup>ΔIEC</sup>* mice co-housed with *Phb1<sup>fl/fl</sup>* littermates exhibit Paneth cell defects and spontaneous ileitis.** (A) H&E staining showing Paneth cells (pink granules) in the ileal crypts. Bar = 50 μm. (B) Immunofluorescent-staining for lysozyme (red), muc2 (green), and DAPI (nucleus, blue) in ileal crypts (dashed line). Arrows denote Paneth cells with normal lysozyme packaging into granules. Bar = 50 μm. (C) Average number of lysozyme<sup>+</sup> cells per crypt per mouse. *n* = 14 *Phb1<sup>fl/fl</sup>* and 18 *Phb1<sup>ΔPC</sup>* mice. (D) Paneth cell lysozyme allocation patterns. *n* = 16 each genotype. (E) mRNA quantification in ileum by qRT-PCR. *n* = 15 *Phb1<sup>fl/fl</sup>* and 14 *Phb1<sup>ΔPC</sup>* mice. Outliers were identified by ROUT test (*Q* = 1%) and were removed from *Phb1<sup>fl/fl</sup>* *Ang4* and *Phb1<sup>ΔPC</sup>* *Cryptdin3*, *Cryptdin 5*. (F) AB-PAS staining of ileum and number of AB-PAS<sup>+</sup> cells/crypt base. Bar = 100 μm. Dashed line denotes crypt base. *n* = 15 each genotype. (G) Histological inflammation scoring of ileum. Arrow denotes infiltrating immune cells. Bar = 100 μm. *n* = 15 each genotype. AB-PAS, calcein blue-periodic acid Schiff; Ang4, angiogenin 4; H&E, hematoxylin & eosin; muc2, mucin2. Results are presented as individual mice ± SD. \*\**P* < 0.01, \*\*\**P* < 0.001, \*\*\*\**P* < 0.0001.

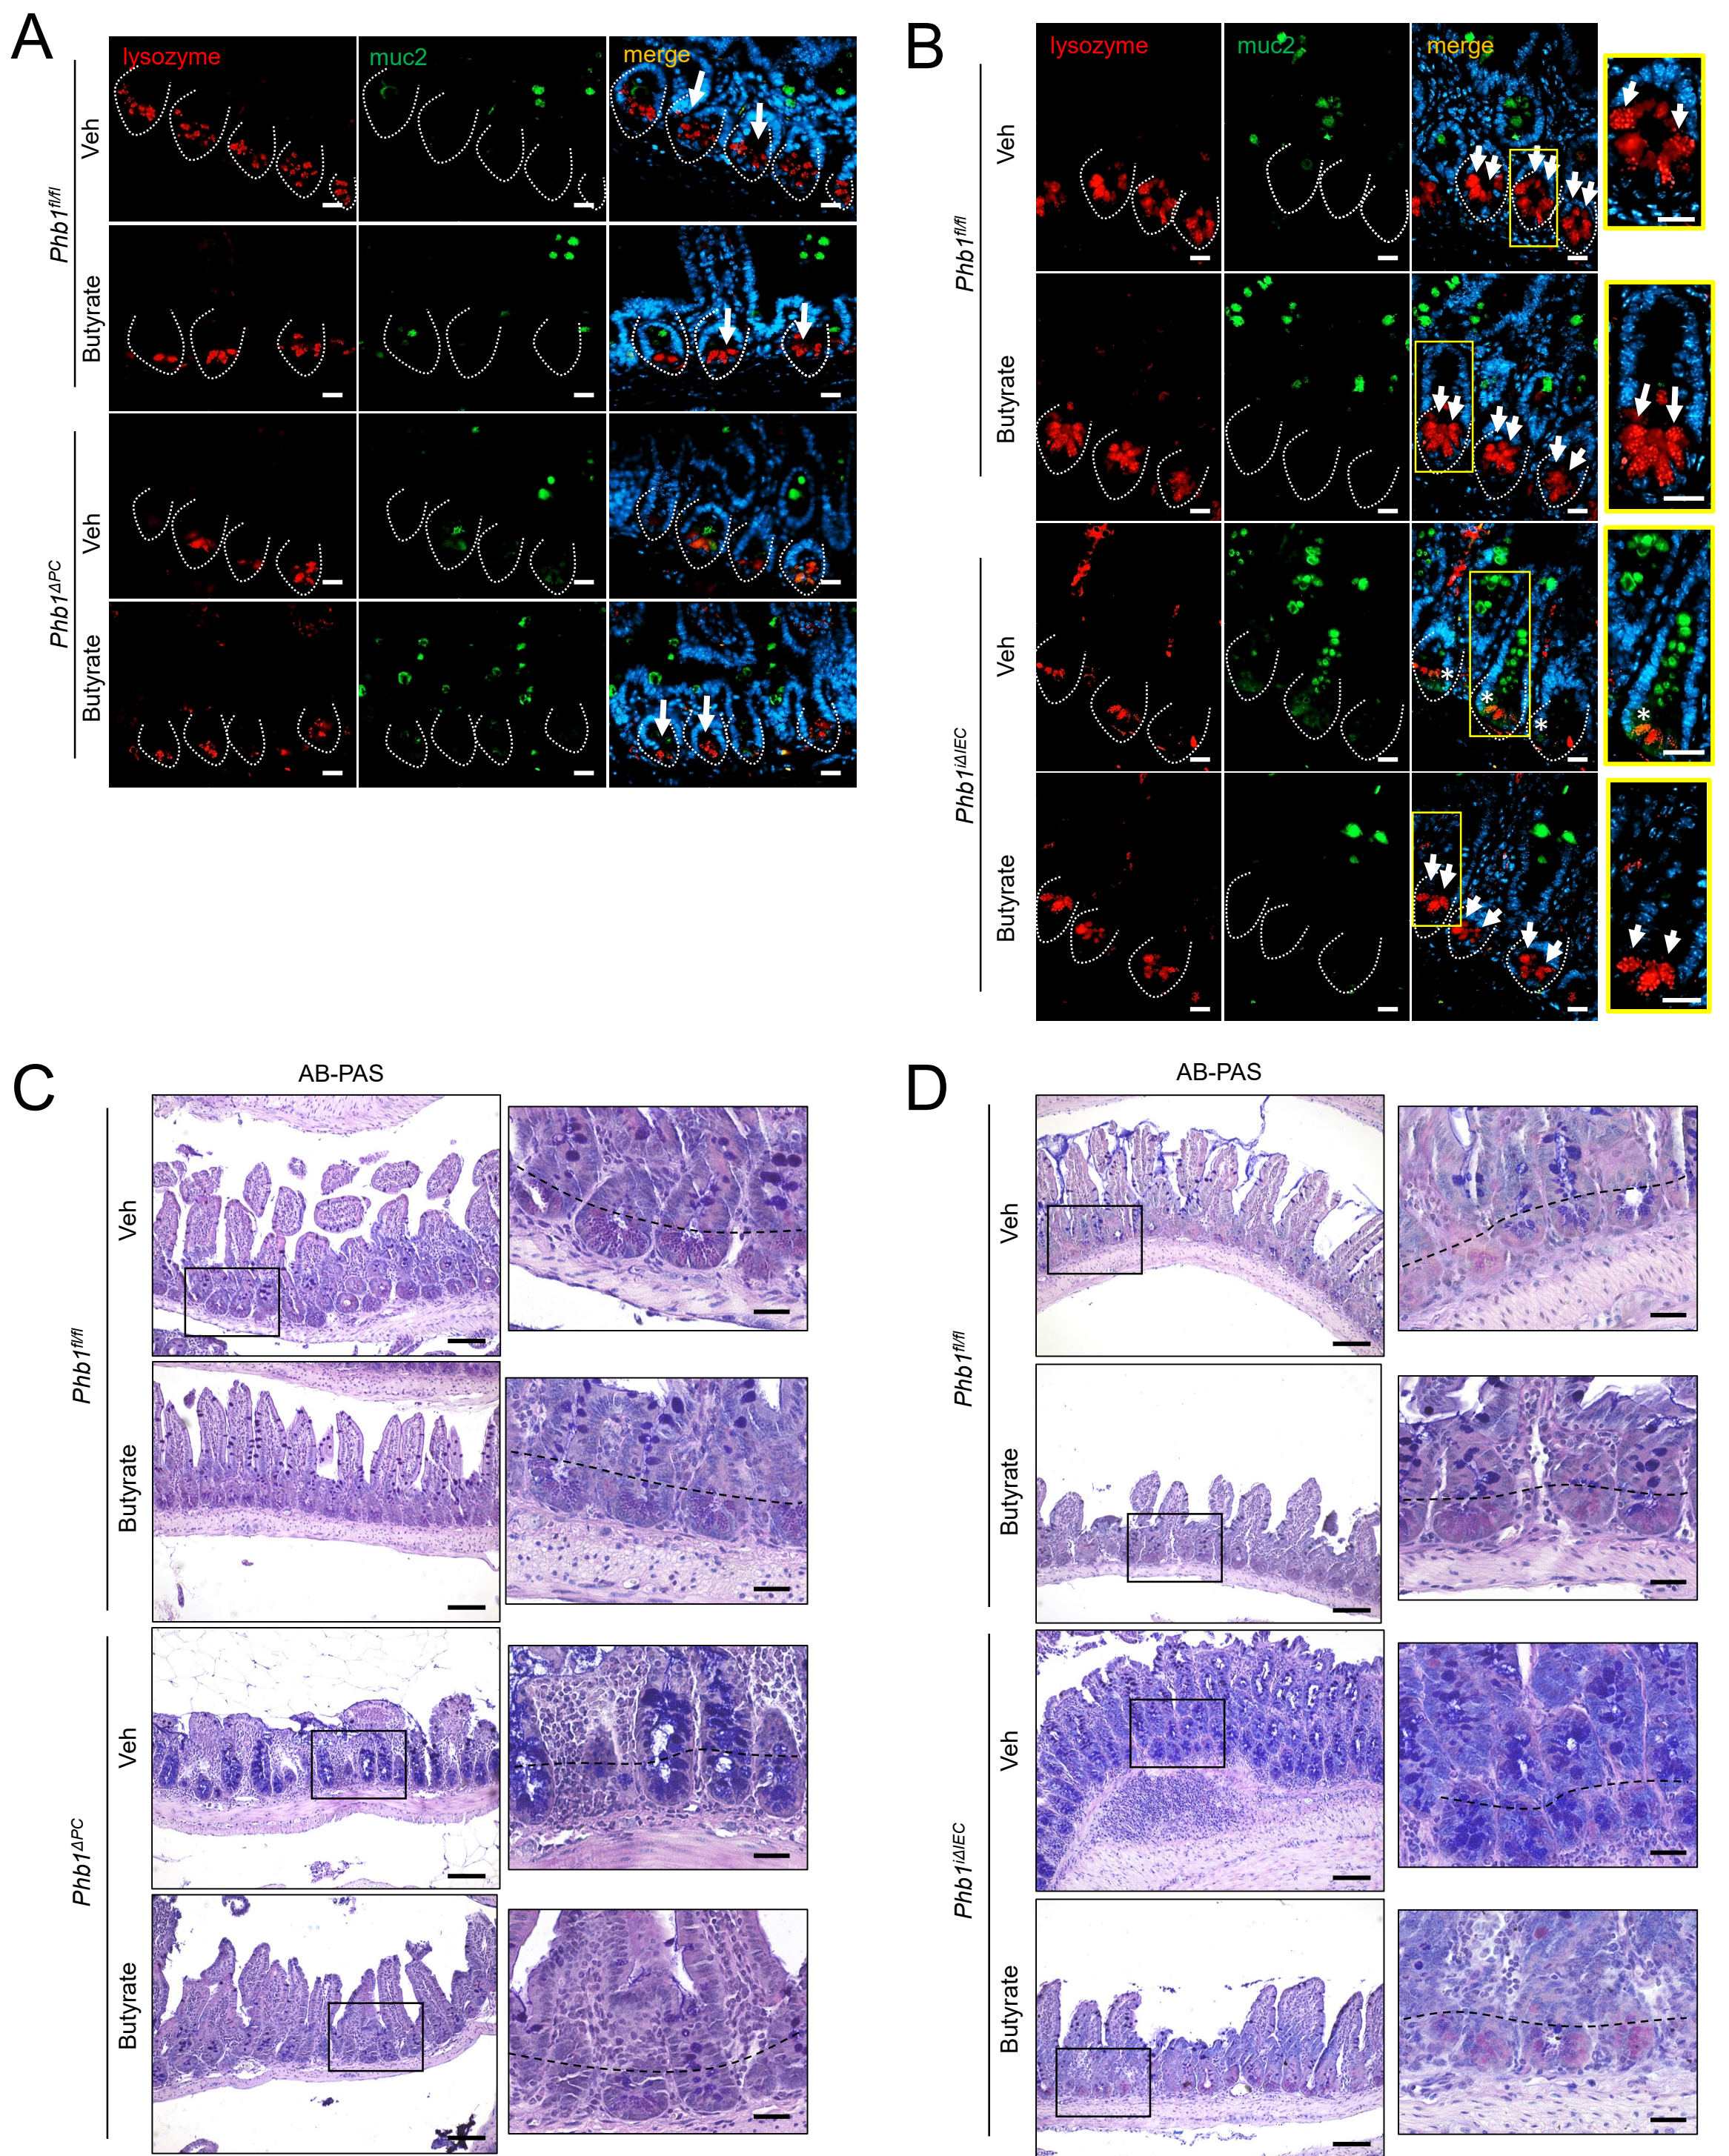

**Supplemental Figure S5. Butyrate supplementation prevents Paneth cell defects in *Phb1*-deficient mice.** (A-B) Immunofluorescent-staining for lysozyme (red), muc2 (green), and DAPI (nucleus, blue) in ileal crypts (white outline) of *Phb1*<sup>ΔPC</sup> mice and *Phb1*<sup>fl/fl</sup> littermates (A) or *Phb1*<sup>ΔIEC</sup> mice and *Phb1*<sup>fl/fl</sup> littermates (B). Arrows denote Paneth cells with normal Lysozyme packaging into granules. Asterisk denotes Muc2 colocalization with Lysozyme. Bar = 50 μm. (C-D) AB-PAS staining of ileum. Bar = 100 μm. Dashed line denotes crypt base. AB-PAS, alcian blue-periodic acid Schiff; muc2, mucin2; Veh, vehicle

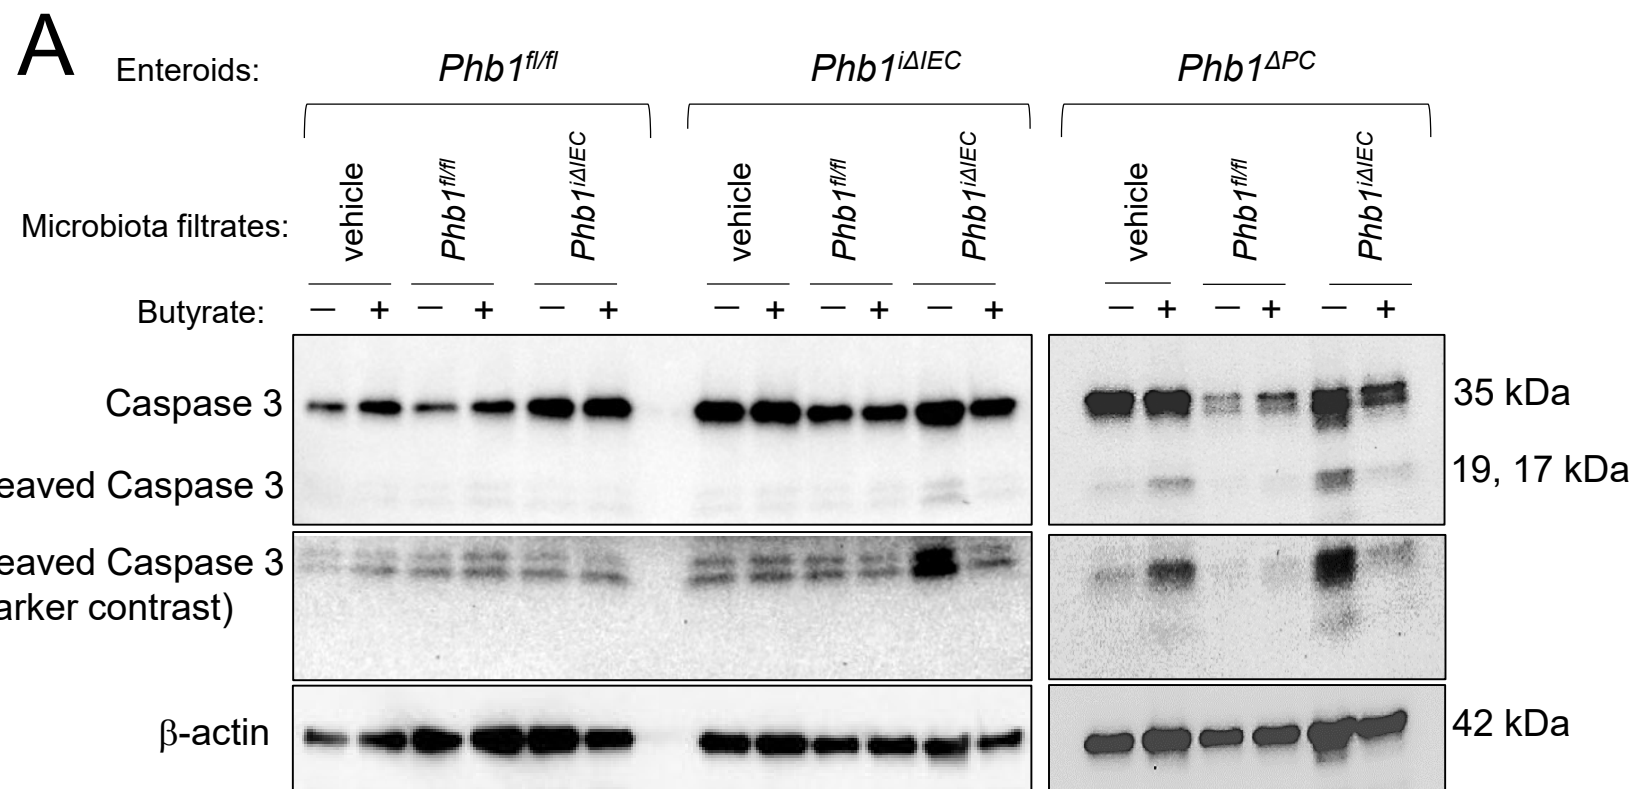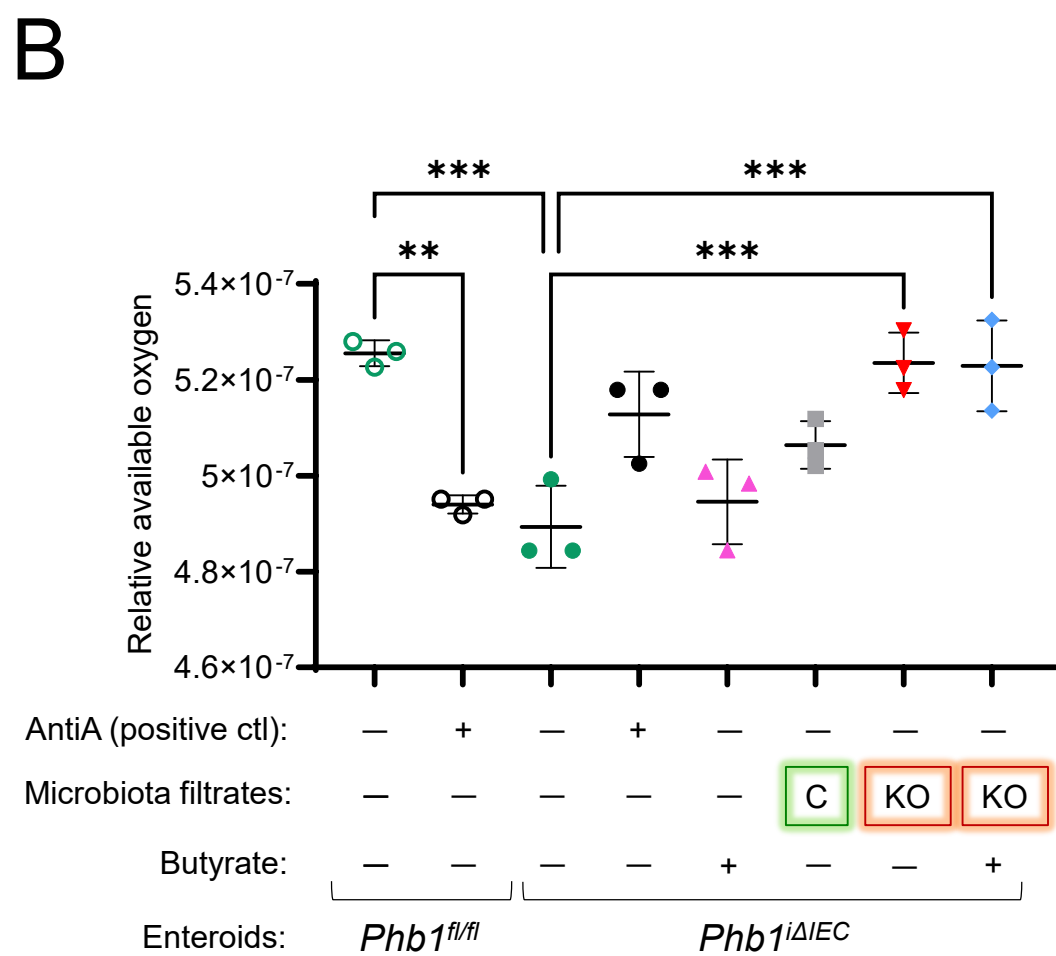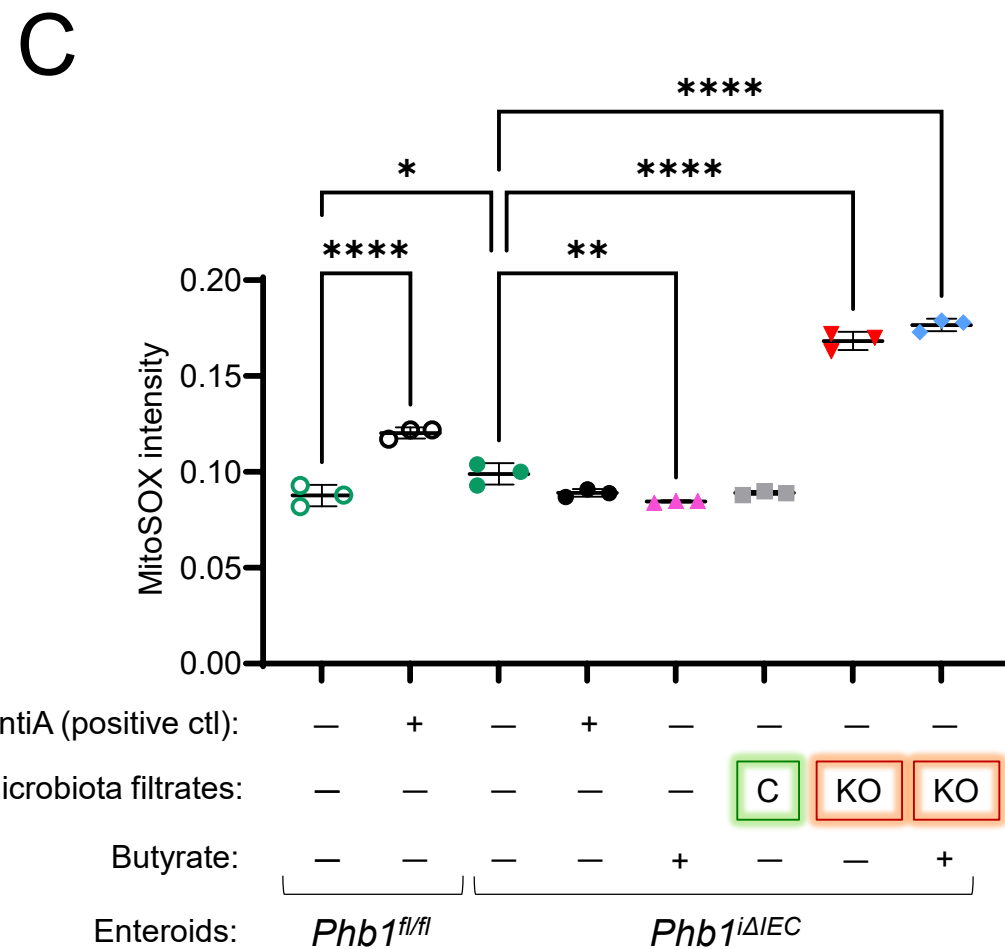

**Supplemental Figure S6. Butyrate protects *Phb1*-deficient ileal enteroids from *Phb1<sup>iΔIEC</sup>* microbiota-induced death.** (A) Western blots for total and cleaved Caspase 3 indicating apoptosis. (B) Oxygen consumption relative to *Phb1<sup>fl/fl</sup>* vehicle enteroids. As a positive control, enteroids were treated with 0.1 μM Antimycin A 15 min prior to oxygen measurements.  $n = 3$  for all treatments. (C) Mitochondrial superoxide level as measured by MitoSOX fluorescence intensity.  $n = 3$  for all treatments, results are representative of 2 separate experiments. C: *Phb1<sup>fl/fl</sup>* microbiota filtrate, KO: *Phb1<sup>iΔIEC</sup>* microbiota filtrate.  $n = 3$  for all treatments. AntiA, Antimycin A. Results are presented as individual mice  $\pm$  SD. \* $P < 0.05$ , \*\* $P < 0.01$ , \*\*\* $P < 0.005$ , \*\*\*\* $P < 0.0001$ .
